# Supplementary material for: BioShell-Threading: versatile Monte Carlo package for protein 3D threading
Source: Springer Nature journal article supplement (doi:10.1186/1471-2105-15-22), 2014-01-20

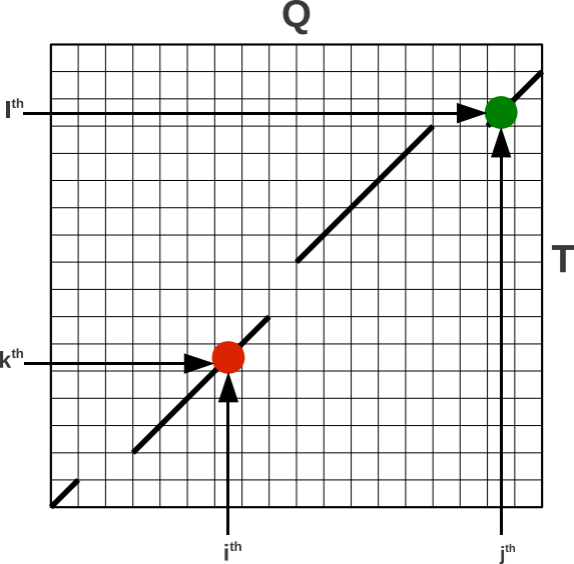

Supplement: 12859_2012_6816_MOESM1_ESM.pdf [file 12859_2012_6816_MOESM1_ESM.pdf]
